# Supplementary material
Source: Elsevier journal article supplement (https://www.sciencedirect.com/science/article/pii/S2530064421000031)
Supplement: mmc2 [file S2530064421000031:mmc2.xlsx]

## Sheet: Sup 2
Sup 2 – Pollinator-relevant legislation of Brazil (including regions and states)
Region	State	Law / Policy of Title/ description	Category	Year of effect	Scope	Dicks et al. 2016 categories
North	Acre	LAW 3,395, DE 26 JULY 2018 - Provides for the creation, trade, and transport of stingless bees (meliponine) in the State.	Meliponiculture practices	2018	State	4
Norte	Acre	LAW 2,843, DE 9 JANUARY 2014 - "Provides for the production, import, export, distribution, storage, internal transportation, trade, provision of services, consumption, use and return, receipt, collection and final destination of the packaging and leftovers of pesticides, its components and the like in the State and provides other measures."	Pesticide use	2014	Municipal	1
Norte	Amapá	Law 2260 - Provides for rules for registration of processing establishments and marketing of edible artisanal products of animal and vegetable origin in the State of Amapá, and provides other measures.	Apiculture practices	2017	State	x
Norte	Amapá	Law 1094 - Provides for the authorization of the inclusion of bee honey and its derivatives in the menus of the School Lunch Program of the State of Amapá and provides other measures.	Awareness	2007	State	x
Norte	Amapá	Law 0869 - Provides for the defense, inspection, and sanitary supervision of plant, animal and products, and by-products, including edible artisanal products, of animal and vegetable origin, creates the Service of Industrial and Sanitary Inspection of Products and Byproducts of Animal and Vegetable Origin - SIE, within the State of Amapá and provides other measures.	Apiculture practices	2004	State	x
Norte	Amapá	Law 0161 - Provides for the Budget Guidelines for the financial year 1995 and provides other measures	Economic aspects	1994	State	other
Norte	Amapá	Law 0086 - Provides for inspection, classification and establishment of quality and health standards for the marketing of products and sub-products of animal origin and provides other measures.	Apiculture practices	1993	State	x
Norte	Amapá	Law 0080 - Provides for the control of agrotoxicproducts, their components and the like in the territory of the State of Amapá and provides other measures	Pesticide use	1993	State	1
Norte	Amapá	Law 2,246 - Provides for the production, marketing, transportation, storage and use of agrotoxicproducts, their components and the like in the State of Amapá and provides other measures.	Pesticide use	2017	State	1
Norte	Amazonas	Law 4,266 - Establishes the Amazon State Policy of Environmental Services and the Environmental Services Management System, creates the State Fund for Climate Change, Environmental Conservation and Environmental Services, amends State Laws 3,135/200	Awareness	2015	State	8
Norte	Amazonas	Law 2.171 - Provides for the marketing of foods prepared by traditional or artisanal processes and provides other measures.	Apiculture practices	2016	State	x
Norte	Amazonas	Law 1130 - PROVIDES FOR THE ESTABLISHMENT OF THE MUNICIPAL INSPECTION SERVICE RELATING TO PRODUCTS OF ANIMAL AND VEGETABLE ORIGIN (YES/POA-POV) AND ADOPTS OTHER MEASURES.	Apiculture practices	2007	Municipal	x
Norte	Amazonas	Law 988 - ESTABLISHES THE CODE OF POSTURES OF THE MUNICIPALITY AND PROVIDES OTHER MEASURES	City planning	1967	Municipal	x
Norte	Amazonas	Law 2402 Amends Law 1,838, of January 16, 2014, which provides for the Rules of Land Use and Occupation in the Municipality of Manaus, and provides other measures.	Pesticide use	2019	Municipal	x
Norte	Amazonas	Law 605 - ESTABLISHES THE ENVIRONMENTAL CODE OF THE MUNICIPALITY OF MANAUS AND PROVIDES OTHER MEASURES.	Pesticide use	2001	Municipal	1
Norte	Pará	Law 7,565 Provides for standards for licensing processing establishments, registration and marketing of artisanal products with animal and vegetable origin in the State of Pará, and provides other measures.	Apiculture practices	2011	State	x
Norte	Pará	DECREE 480 Regulates Law 7,565, of October 25, 2011, which provides for the standards for licensing of processing establishments, registration and marketing of edible handmade products of animal and vegetable origin in the State of Pará and provides other measures.	Apiculture practices	2012	State	x
Norte	Pará	DECREE 1,380 Regulates Law 7,565 of October 25, 2011, which provides for the rules for licensing processing establishments, registration and marketing of edible artisanal products of animal and vegetable origin in the State of Pará and provides other measures.	Apiculture practices	2015	State	x
Norte	Pará	DECREE 1,417 Approves the Regulation of the Inspection and Industrial and Sanitary Inspection of Products of Animal Origin, in the State of Pará.	Apiculture practices	2015	State	x
Norte	Pará	Ordinary Law 7.392 Provides for Plant Sanitary Defense within the State of Pará and provides other measures.	Pesticide use	2010	State	1
Norte	Pará	DECREE 2089 Provides for the creation of the State Commission for the Prevention, Preparation and Rapid Response to Environmental Emergencies with Hazardous Chemicals - CE-P2R2 of the State of Pará, and provides other measures.	Pesticide use	2010	State	1
Norte	Pará	STATE CONSTITUTION	Pesticide use	1989	State	1
Norte	Rondônia	Law 1449 - "PROVIDES FOR MUNICIPAL INDUSTRIAL AND SANITARY INSPECTION SERVICES OF PRODUCTS OF ANIMAL ORIGIN".	Apiculture practices	2001	Municipal	x
Norte	Rondônia	Law 1,841 Provides for the production, marketing, transportation, storage and use of agrotoxicproducts, their components and the like in the State of Rondônia and revokes Law 1,071 of November 20, 2001, and provides other measures.	Pesticide use	2007	State	1
Norte	Rondônia	Decree 22991 DE 03/07/2018 - Regulates Law 4,130, of September 4, 2017, which "Provides for the Sanitary and Industrial Inspection Service of products and by-products of animal origin in the State of Rondônia, and provides other measures.".	Apiculture practices	2018	State	x
Norte	Rondônia	Ordinary Law 693 - PROVIDES ON PRODUCTION, MARKETING, TRANSPORTATION, STORAGE AND USE OF PESTICIDES, ITS COMPONENTS AND RELATED, CREATES THE STATE COMMISSION FOR CONTROL OF PESTICIDES AND BIOCIDES - CECAB, AND PROVIDES OTHER MEASURES.	Pesticide use	1996	State	1
Norte	Rondônia	Ordinary Law 1017 - PROVIDES ON PRODUCTION, MARKETING, TRANSPORTATION, STORAGE AND USE OF PESTICIDES, ITS COMPONENTS AND RELATED IN THE STATE OF RONDÔNIA, REVOKES Law 693, OF DECEMBER 27, 1996 AND GIVES OTHER MEASURES	Pesticide use	2001	State	1
Norte	Rondônia	Ordinary Law 27 - PROVIDES ON THE USE OF AGRONOMIC RECEPTION IN RONDÔNIA.	Pesticide use	1984	State	1
Norte	Roraima	Ordinary Law N. 881 - PROVIDES ON THE PRODUCTION, TRANSPORTATION, STORAGE, MARKETING, USE, THE FINAL DESTINATION OF WASTE AND EMPTY PACKAGING, THE CONTROL, INSPECTION AND INSPECTION OF PESTICIDES, ITS COMPONENTS AND RELATED, IN THE STATE OF RORAIMA, AND PROVIDES OTHER MEASURES.	Pesticide use	2012	State	1
Norte	Tocantins	Law 371/92 - ESTABLISHES THE CODE OF POSTURES OF THE MUNICIPALITY OF PALMAS AND GIVES OTHER MEASURES	City planning	1992	Municipal	4
Norte	Tocantins	Law 1079 - "Provides for the creation of the Municipal Inspection Service - YES - and regulates the Sanitary and Industrial Inspection of Products of Animal Origin, in the municipality of Tocantins Hills and provides other measures".	Apiculture practices	2010	Municipal	x
Norte	Tocantins	Law 1549 - Establishes in the municipality of Tocantins hills the differentiated and favored treatment of micro enterprises and small businesses that complementary law 123, of December 14, 2006, and provides other measures.	Pesticide use	2017	Municipal	x
Norte	Tocantins	DECREE 38 - ESTABLISHES THE MUNICIPAL PROGRAM OF ENVIRONMENTAL EDUCATION IN HILLS OF TOCANTINS - TO AND PROVIDES OTHER MEASURES	Pesticide use	2014	Municipal	campain
Norte	Tocantins	Law 224 Provides for agrotoxic products and provides other measures	Pesticide use	1990	State	1
Norte	Tocantins	Law 1011 - PROVIDES ON ENVIRONMENTAL POLICY, ECOLOGICAL BALANCE, PRESERVATION AND RECOVERY OF THE ENVIRONMENT AND PROVIDES OTHER MEASURES	Pesticide use	2001	State	1
Norte	Tocantins	MUNICIPAL ORGANIC Law	Pesticide use	1990	Municipal	1
Norte	Tocantins	Law 1840 - ESTABLISHES THE SANITARY CODE OF THE MUNICIPALITY OF PALMAS AND PROVIDES OTHER MEASURES	Pesticide use	2011	Municipal	1
Northeast	Alagoas	ORDINARY LAW PROJECT 239 of 2016 - PROVIDES FOR THE PROHIBITION OF AERIAL SPRAYING OF PESTICIDES THROUGHOUT ALAGOAS TERRITORY	Pesticide use	2016	State	1
Nordeste	Alagoas	Law ORDINARIA 8.041- PROVIDES ON THE ESTABLISHMENT OF STATE POLICY OF AGROECOLOGY AND ORGANIC PRODUCTION	Pesticide use	2018	State	5, 10
Nordeste	Alagoas	Law ORDINARIA 6.192 - PROVIDES FOR THE STRUCTURE OF THE SECRETARY OF STATE FOR AGRICULTURE, SUPPLY AND FISHING	Awareness	2000	State	1
Nordeste	Alagoas	Law ORDINARIA 7,333 - PROVIDES FOR THE MULTIANNUAL PLAN FOR THE PERIOD 2012-2015, PURSUANT. 176, § 1 OF THE STATE CONSTITUTION, AND PROVIDES OTHER MEASURES	Pesticide use	2012	State	1
Nordeste	Alagoas	Delegated Law 47 - ESTABLISHES THE MANAGEMENT MODEL OF THE STATE PUBLIC ADMINISTRATION OF THE EXECUTIVE POWER, AND PROVIDES OTHER MEASURES	Pesticide use	2015	State	x
Nordeste	Alagoas	Law 7,871 - ESTIMATES THE REVENUE AND FIXING THE EXPENDITURE OF THE STATE OF ALAGOAS FOR THE FINANCIAL YEAR 2017	City planning	2017	State	x
Nordeste	Bahia	Law 13,905 - Provides for the creation, trade, conservation and transport of native bees without stinger (meliponineos), in the State of Bahia	Pesticide use	2018	State	4, 6
Nordeste	Bahia	Law 12,215 - Provides for the Sanitary and Industrial Inspection Service of Animal Products in the State of Bahia, and provides other measures.	Pesticide use	2011	State	x
Nordeste	Bahia	DECREE 15,004 - Approves the Regulation of Law 12,215, of May 30, 2011, which provides for the Sanitary and Industrial Inspection Service of Animal Products in the State of Bahia, and provides other measures.	Apiculture practices	2014	State	x
Nordeste	Bahia	DECREE 7,854 - Approves the Regulation of Law 7,597, of February 7, 2000, which provides for Animal Sanitary Defense in the State of Bahia and provides other measures.	Apiculture practices	2000	State	x
Nordeste	Bahia	DECREE 28,700 - Approves the Regulation of Agricultural Promotional Events in the State of Bahia and provides other measures.	Apiculture practices	1982	State	x
Nordeste	Bahia	DECREE 25.595 - REGULATES Law 8,512 OF December 16, 2013, WHICH PROVIDES FOR THE PROHIBITION OF THROWING GARBAGE IN PUBLIC PLACES, AND PROVIDES OTHER MEASURES.	Apiculture practices	2014	Municipal	1
Nordeste	Bahia	Law 8629 - PROVIDES ON THE PLAN OF POSITIONS AND SALARIES OF THE SERVANTS OF DIRECT ADMINISTRATION, OF THE MUNICIPALITIES AND PUBLIC FOUNDATIONS OF THE MUNICIPALITY OF SALVADOR AND PROVIDES OTHER MEASURES.	Pesticide use	2014	Municipal	x
Nordeste	Bahia	Law 5504 - ESTABLISHES THE MUNICIPAL HEALTH CODE	City planning	1999	Municipal	1
Nordeste	Bahia	Law 13.925 - Provides for the use of organic food in school meals in the state public school units.	Pesticide use	2018	State	5
Nordeste	Ceará	Law 14,560 Provides for exemption from the Tax on Operations Related to the Movement of Goods and On Services of Interstate and Intermunicipal Transport services and Communication - ICMS in the operations and services with food framed in the National Program for Strengthening Family Agriculture - PRONAF, aimed at meeting the demands of food and nutritional supplementation of the state's social pr…	Awareness	2009	State	x
Nordeste	Ceará	Law 14. 036 - Changes the provision of Law 12,670 of December 27, 1996.	Economic aspects	2007	State	x
Nordeste	Ceará	Law 12,670 - Provides for the Tax on Operations related to the Movement of Goods and on Services of Interstate and Intermunicipal Transport and Communication Services - ICMS -, and provides other measures	Economic aspects	1996	State	x
Nordeste	Ceará	Law 12,024 - Gives new wording to Article 42 of Law	Economic aspects	1992	State	x
Nordeste	Ceará	Law 11.988 Provides for sanitary and industrial inspection of products of animal origin in the State of Ceará and provides other measures.	Economic aspects	1992	State	x
Nordeste	Ceará	Law 14,050 - Establishes guidelines for the use and occupation of the Environmental Protection Area - APA, uruaú lagoon, located in the municipality of Beberibe.	Apiculture practices	2008	State	1
Nordeste	Ceará	Law 13,779 - Structure and approves the Plan of Jobs, Careers and Salaries of Employees of the Technical Assistance and Rural Extension Company of Ceará - EMATERCE, and provides other measures.	Pesticide use	2006	State	1
Nordeste	Ceará	Law 12,974 - Provides for the creation and implementation of the Green Seal of Ceará, and provides other measures.	Pesticide use	1999	State	5
Nordeste	Ceará	Law 5530 - PROVIDES ABOUT THE CODE OF WORKS AND POSTURES OF THE MUNICIPALITY OF FORTALEZA AND GIVES OTHER MEASURES	Awareness	1981	Municipal	x
Nordeste	Ceará	Law 16,820 - Includes a provision in State Law 12,228 of December 9, 1993, which provides for the use, production, consumption, trade and storage of pesticides, their components and purposes, as well as on the supervision of the use of consumption of trade, storage and internal transportation of these products.	City planning	2019	State	1
Nordeste	Maranhão	Law 10986 - Institutes the State Policy of Agroecology and Organic Production of Maranhão (Peapoma), with the objective of promoting Agroecology and Organic Production as a way to expand and strengthen the segments of Maranhão agriculture.	Pesticide use	2018	State	5, 7, 10
Nordeste	Maranhão	Law 11.101 - Provides for the creation, management, trade and transport of native social bees (meliponines) and provides other measures.	Awareness	2009	State	4, 6
Nordeste	Maranhão	Law 9972 - Provides for the creation of fees under the Plant Sanitary Defense Service, inspection and supervision of agrotoxicproducts, their components and the like, in the State of Maranhão and provides other measures.	Meliponiculture practices	2013	State	x
Nordeste	Maranhão	Law 8,521 - Provides for the production, transport, storage, marketing, use, final destination of waste and empty packaging, control, inspection and supervision of pesticides, their components	Pesticide use	2006	State	1
Nordeste	Maranhão	Law 8.193 - Provides for research, experimentation, production, packaging and labeling, transportation, storage, marketing, use, import, export, registration, final destination of waste and empty packaging, control, inspection and inspection of pesticides, their components and the like, in the State of Maranhão, and provides other measures.	Pesticide use	2004	State	1
Nordeste	Maranhão	Law 1.790 - CODE OF POSTURES OF THE MUNICIPALITY OF ST. LOUIS	Pesticide use	1968	Municipal	x
Nordeste	Maranhão	Law 324 - ESTABLISHES THE CODE OF POSTURES OF THE MUNICIPALITY OF BURITICUPU AND PROVIDES OTHER MEASURES	City planning	2014	Municipal	1
Nordeste	Maranhão	Law 3546 - PROVIDES ON HEALTH SURVEILLANCE IN THE MUNICIPALITY OF SÃO LUÍS, AND PROVIDES OTHER MEASURES.	Apiculture practices	1996	Municipal	1
Nordeste	Maranhão	ORGANIC LAW OF THE MUNICIPALITY OF SAO LUIS/MA	Pesticide use	1990	Municipal	1
Nordeste	Paraíba	Ordinary Law 9781 - ESTABLISHES THE STATE DAY TO COMBAT PESTICIDES AND PROVIDES OTHER MEASURES.	Pesticide use	2012	State	campain
Nordeste	Paraíba	Complementary Law 16 - ESTABLISHES CODE OF POSTURE IN THE MUNICIPALITY AND PROVIDES OTHER MEASURES	Pesticide use	1996	Municipal	x
Nordeste	Minas Gerais	Complementary Law 34 - CODE DE WORKS	City planning	2014	Municipal	x
Nordeste	Paraíba	Law 12.101 - ESTABLISHES THE MUNICIPAL SYSTEM OF PROTECTED AREAS OF JOÃO PESSOA AND PROVIDES OTHER MEASURES	City planning	2011	Municipal	8
Nordeste	Paraíba	Law 9,007 Provides for trade, transportation, storage, use and application, the final destination of waste and empty packaging, the control, inspection and inspection of pesticides, its components and the like, as well as the monitoring of its waste in plant products, and provides other measures.	Awareness	2009	State	1
Nordeste	Paraíba	Complementary Law 100 - ESTABLISHES THE HEALTH CODE OF THE MUNICIPALITY OF JOÃO PESSOA, AND PROVIDES OTHER MEASURES.	Pesticide use	2016	Municipal	1
Nordeste	Paraíba	Complementary Law 29	Pesticide use	2002	Municipal	1
Nordeste	Paraíba	Law 11.178 - PROVIDES FOR THE DISPATCH OF SANITARY LICENSE BY THE MUNICIPAL HEALTH SECRETARIAT, REVOKES Law 8193/96, OF DECEMBER 20, 1996, AND GIVES OTHER MEASURES.	Pesticide use	2007	Municipal	1
Nordeste	Pernambuco	Law 14.090 - Institutes the State Policy to Combat Climate Change of Pernambuco, and provides other measures.	Pesticide use	2010	State	11
Nordeste	Pernambuco	Law 15,809 - Establishes the State Payment Policy for Environmental Services, creates the State Program for Payment for Environmental Services and the State Fund for Payment for Environmental Services.	Awareness	2016	State	5, 10
Nordeste	Pernambuco	Law 13,993 - Grants presumed credit from ICMS on interstate bee honey outflows promoted by producer or cooperative producers.	Awareness	2009	State	x
Nordeste	Pernambuco	DECREE 30.109 - Introduces changes in the Consolidation of the State's Tax Legislation, regarding the deferral of the collection of ICMS in the internal output of bee honey, promoted by the respective producer, and in the import of bars, coils, plates, ingots, profiles, scraps and other products, steel, copper, copper, or aluminum, as specified, by industrial establishment, for use as raw materia…	Economic aspects	2006	State	x
Nordeste	Pernambuco	DECREE 42.109 - Provides for the qualification and sanitary licensing of the Small Rural Agroindustry Establishment.	Economic aspects	2015	State	x
Nordeste	Pernambuco	Law 15.193 - Provides for the Sanitary License of Small Rural Agroindustrial Establishment in the State.	Apiculture practices	2013	State	x
Nordeste	Pernambuco	DECREE 35,031 - Introduces changes in the Consolidation of the State's Tax Legislation, regarding tax benefits.	Apiculture practices	2010	State	x
Nordeste	Pernambuco	Law 11.206 - Provides for forest policy in the State of Pernambuco, and provides other measures.	Economic aspects	1995	State	6
Nordeste	Pernambuco	Law 15,948 - Provides for the granting of tax benefits related to the Tax on Operations related to the Movement of Goods and on The Provision of Interstate and Intermunicipal Transportation services and ICMS Communication.	Awareness	2016	State	x
Nordeste	Pernambuco	DECREE 46,957 Reinstitutes the tax benefits related to the Tax on Operations related to the Movement of Goods and on Services of Interstate and Intermunicipal Transportation and Communication Services - ICMS, according to Federal Complementary Law 160, of August 7, 2017, and the ICMS Agreement 190/2017.	Economic aspects	2018	State	x
Nordeste	Pernambuco	DECREE 45,801 Lists and identifies the normative acts related to tax benefits in force on August 8, 2017, established by state law, in compliance with the provisions of Federal Complementary Law 160, of August 7, 2017, and ICMS Agreement 190/2017.	Economic aspects	2018	State	x
Nordeste	Pernambuco	DECREE 44,650 Regulates Law 15,730, of March 17, 2016, which provides for the ICMS.	Economic aspects	2017	State	x
Nordeste	Pernambuco	DECREE 44,058 Regulates Law 12,319, of December 30, 2002, which provides for the collection of the Tax On Inspection and Use of Public Services - TFUSP, for carrying out inspection activities in the areas of defense and agricultural inspection.	Economic aspects	2017	State	x
Nordeste	Pernambuco	DECREE 43,901 Introduces changes to Decree 14,876 of March 12, 1991, which consolidates the state's tax legislation on ICMS.	Pesticide use	2016	State	x
Nordeste	Pernambuco	Law 15,930 - Amends Law 12,319 of December 30, 2002, and Law 10,689 of December 1991 and repeals Law 10,851 of December 28, 1992.	Economic aspects	2016	State	x
Nordeste	Pernambuco	DECREE 39.235 - Grants stimulus provided for in Law 11.675, of October 11, 1999, which Provides on PRODEPE, distributor company BIG BENN S.A.	Pesticide use	2013	State	x
Nordeste	Pernambuco	DECREE 37.882 - Opens to the State Fiscal Budget, for the year 2012, supplementary credit in the amount of R$ 45,378,227.00 in favor of the Secretariat of Science and Technology.	Economic aspects	2012	State	x
Nordeste	Pernambuco	DECREE 34.650 - Opens to the State Fiscal Budget, for the year 2010, supplementary credit in the amount of R$ 2,251,714.26, in favor of the Secretariat of Science, Technology, and Environment.	Economic aspects	2010	State	x
Nordeste	Pernambuco	DECREE 33,972 - Provides for the stimulus enjoyment provided for in Law 11,675, of October 11, 1999, and amendments, which deals with PRODEPE, granted to the company INFAN - INDÚSTRIA QUÍMICA FARMACÊUTICA NACIONAL S/A, by Decree 32,021, of June 29, 2008.	Economic aspects	2009	State	x
Nordeste	Pernambuco	Law 11,875 Modifies and consolidates Law 11,751 of April 3, 2000, which provides for the food composition of school meals distributed to the public school system in the State of Pernambuco.	Economic aspects	2000	State	x
Nordeste	Pernambuco	Law 9.465 Provides for the use of pesticides in the State and provides other measures.	Awareness	1984	State	1
Nordeste	Pernambuco	DECREE 31,246 Regulates Law 12,753, of January 21, 2005, which provides, within the state of Pernambuco, on trade, transportation, storage, use and application, the final destination of waste and empty packaging, the control, inspection and inspection of pesticides, its components and the like, as well as the monitoring of its waste in plant products, and makes other arrangements.	Pesticide use	2007	State	1
Nordeste	Pernambuco	Law 12,753 - (Regulated by Decree 31,246 of December 28, 2007.) It Provides About Trade, Transportation, Storage, Use and Application, The Final Destination of Waste and Empty Packaging, Control, Inspection and Inspection of Pesticides, Its Components and The Like, As Well As Monitoring Of Waste In-Plant Products, and Provides Other Measures.	Pesticide use	2005	State	1
Nordeste	Pernambuco	Law 15,937 Amends Article 6 of Law 12,753 of January 21, 2005, which provides for trade, transportation, storage, use and application, the final destination of waste and empty packaging, the control, inspection, and inspection of pesticides, their components, and the like, as well as the monitoring of their waste in plant products and provides measures other.	Pesticide use	2016	State	1
Nordeste	Pernambuco	DECREE 46,857 Establishes state commission for the development of the Agroecology and Organic Production Plan of the State of Pernambuco, within the scope of the Secretariat of Agriculture and Agrarian Reform.	Pesticide use	2018	State	7
Nordeste	Pernambuco	Law 12,503 Institutes the Plant Sanitary Defense in the State of Pernambuco and provides other measures.	Awareness	2003	State	1
Nordeste	Pernambuco	Law 11.125 Adjusts the salary, salary, salary, and gratuities of civil and military-civil servants of the Executive Branch.	Pesticide use	1994	State	1
Nordeste	Pernambuco	DECREE 28.822- Amends provisions of Decree 24,017 of February 7, 2002, which approves the Coastal Economic Ecological Zoning - ZEEC of the North Coast of the State of Pernambuco, and provides other measures.	Economic aspects	2006	State	1
Nordeste	Pernambuco	Law 15,919 - (See Law 16,235 of 14 December 2017 - Provides for fines which adagro is fined and charged.) Creates the Agricultural Defense and Inspection Agency of the State of Pernambuco.	Pesticide use	2016	State	1
Nordeste	Pernambuco	Law 15,930 Amends Law 12,319 of December 30, 2002, and Law 10,689 of December 1991 and repeals Law 10,851 of December 28, 1992.	Pesticide use	2016	State	x
Nordeste	Pernambuco	DECREE 44.265 Institutes the "Horta in Todo Canto Program", aiming to stimulate the implementation of organic gardens in state and municipal public spaces in the State of Pernambuco.	Economic aspects	2017	State	8
Nordeste	Pernambuco	Law 16,235 - (Regulated by Decree 45,550 of January 11, 2018.). It provides for fines whose application and collection is the responsibility of the Agency of Defense and Agricultural Supervision of the State of Pernambuco - ADAGRO.	Awareness	2017	State	1
Nordeste	Pernambuco	Law 16.317 Provides for the provision of pharmaceutical services and the marketing of products by pharmacies and drugstores in the State of Pernambuco and provides other measures.	Pesticide use	2018	State	1
Nordeste	Pernambuco	Law 16,320 Regulates fairs of organic and/or agroecological products in the State of Pernambuco and provides other measures.	Pesticide use	2018	State	5,7
Nordeste	Pernambuco	DECREE 43,648 Approves the Regulation of the Secretariat of Agriculture and Agrarian Reform.	Awareness	2016	State	1
Nordeste	Pernambuco	DECREE 46.251 Regulates the provisions of Articles 3 and 7 of Complementary Law 197, of December 21, 2011, which establishes within the scope of the Agricultural Defense and Inspection Agency of the State of Pernambuco - ADAGRO, linked to the Secretariat of Agriculture and Agrarian Reform - SARA, the Plan of Positions, Careers and Salaries - PCCV, for public servants members of its staff.	Pesticide use	2018	State	x
Nordeste	Pernambuco	Law 14,490 Creates, within the scope of the Health Secretariat, the State Toxicological Support Center - CEATOX, and provides other measures.	Pesticide use	2011	State	1
Nordeste	Pernambuco	Law 9,860 - Delimits the areas of protection of the springs of interest of the Metropolitan Region of Recife, and establishes conditions for the preservation of water resources.	Pesticide use	1986	Municipal	1
Nordeste	Piauí	Decree 14.242 - Grants tax incentive to the establishment of the company WALDER L. CAVALCANTE LTDA., CAGEP 19.421.376-5.	Pesticide use	2010	State	x
Nordeste	Piauí	Decree 14.152 - Grants tax incentive to the establishment of the company INTEGRATION BRAZILIAN HONEY & CO. LTDA., CAGEP 19,471,265-6.	Economic aspects	2010	State	x
Nordeste	Piauí	Decree 13.869 - Grants tax incentive to the establishment of the company AFICAL - Ferreira INDÚSTRIA E COMÉRCIO DE ALIMENTOS LTDA, CAGEP 19.470.464-5.	Economic aspects	2009	State	x
Nordeste	Piauí	Decree 13.180 - Grants tax incentive to the establishment of the company APIDOURO COMERCIAL EXPORTADORA E IMPORTADORA LTDA, CAGEP 19.001.662-0.	Economic aspects	2008	State	x
Nordeste	Piauí	Decree 13.158 - Grants tax incentive to the establishment of the company COOPERATIVA MISTA DOS BEERS DA MICROREGIÃO DE SIMPLÍCIO MENDES, CAGEP 19.463.128-1.	Economic aspects	2008	State	x
Nordeste	Piauí	Decree 13.149 - Amends provisions of Decree 10,889 of October 8, 2002, which grants tax incentive to the establishment of the company GUIMARÃES FILHOS & CIA LTDA., CAGEP 19,449,434-9.	Economic aspects	2008	State	x
Nordeste	Piauí	Decree 13.148 - Amends provisions of Decree 10,889 of October 8, 2002, which grants tax incentive to the establishment of the company GUIMARÃES FILHOS & CIA LTDA., CAGEP 19,449,434-9.	Economic aspects	2008	State	x
Nordeste	Piauí	Decree 13.065 - Grants tax incentive to the establishment of the company GLOBAL NUTS INDUSTRIA E COMERCIO DE ALIMENTOS LTDA, CAGEP 19.458.098-9.	Economic aspects	2008	State	x
Nordeste	Piauí	Decree 12,680 - Regulates Law 5,628, of December 29, 2006, which provides for the Animal Sanitary Defense of the State of Piauí.	Economic aspects	2007	State	4
Nordeste	Piauí	Ordinary Law 5,638 - Makes it mandatory to include bee honey in school meals and provides other measures. (*)	Pesticide use	2007	State	awareness
Nordeste	Piauí	Decree 13.066 - Grants tax incentive to the establishment of the company APISCHEL INDUSTRIAL LTDA, CAGEP 19.463.612-7.	Awareness	2008	State	x
Nordeste	Piauí	Decree 12,413 - Amends provisions of Decree 10,533 of April 27, 2001, which grants tax incentive to the establishment of the company S. B. NETO, CAGEP 19,411,893-2.	Economic aspects	2006	State	x
Nordeste	Piauí	Decree 12.409 - Grants tax incentive to the establishment of the company JB CARBON S/A, CAGEP 19.460.024-6.	Economic aspects	2006	State	x
Nordeste	Piauí	Decree 12.406 - Grants tax incentive to the establishment of the company CENTRAL OF APÍCOLAS COOPERATIVES OF THE SEMI-ARIDO BRASILawRO - CASA APIS, CAGEP 19.457.843-7.	Economic aspects	2006	State	x
Nordeste	Piauí	Decree 11.737 - Grants tax incentive to the establishment of the company APIS NATIVA AGROINDUSTRIAL EXPORTADORA LTDA, CAGEP 19.455.473-2.	Economic aspects	2005	State	x
Nordeste	Piauí	Decree 11,738 - Amends provisions of Decree 10,959 of December 23, 2002, which grants tax incentive to the establishment of the company MACHADO & CIA LTDA., CAGEP 19.401.448-7.	Economic aspects	2005	State	x
Nordeste	Piauí	Decree 11,719 - Amends the provisions of Decree 9,406 of September 29, 1995. The GOVERNOR OF THE STATE OF PIAUÍ, in the use of the attributions on it the xiii item of art. 102 of the state Constitution, CONSIDERING the need to make adjustments in the tax legislation of the State; CONSIDERING, also, the need to keep updated the state tax legislation.	Economic aspects	1995	State	x
Nordeste	Piauí	Decree 11.616 - Grants tax incentive to the establishment of the company APIAGRO LTDA, CAGEP 19.454.444-3.	Economic aspects	2005	State	x
Nordeste	Piauí	Decree 14,576 - Regulates Law 5,626, of December 29, 2006, which provides for the production, marketing, transportation, storage, and use of pesticides, their components, and the like in the state of Piauí and provides other measures.	Economic aspects	2011	State	1
Nordeste	Piauí	Law 5,626 - Provides for control of pesticides, their components, and the like, in the State of Piauí, and provides other measures.	Pesticide use	2006	State	1
Nordeste	Piauí	Complementary Law 4974 - Establishes the new Tax Code of the Municipality of Teresina and provides other measures.	Pesticide use	2016	Municipal	x
Nordeste	Piauí	Decree 15122 - Regulates Municipal Law 4,623, of August 20, 2014, which constituted the Municipal Inspection Service of Teresina - SIM and the procedures for inspection and sanitary inspection of establishments that process food, of animal and vegetable origin, for human consumption, in the form it specifies.	Pesticide use	2015	Municipal	1
Nordeste	Rio Grande do Norte	Law 10479 - Provides for the creation, trade, and transport of stingless bees in the state of the northern Great River.	Pesticide use	2019	State	4
Nordeste	Rio Grande do Norte	Law 10559 - State Standard - the Rio Grande do Norte - Published in the DOE on July 23, 2019 - Establishes the remission and amnesty of tax credits, constituted or not, arising from exemptions, incentives, and tax or financial-tax benefits established in disagreement with the provisions of Art. 155, § 2, XII, "g", of the Federal Constitution, and promotes the corresponding reinstitutions.	Meliponiculture practices	2019	State	x
Nordeste	Rio Grande do Norte	Decree 26594 - Regulates State Law 8,672, of July 8, 2005, which provides for the control of production, trade, use, storage, internal transportation and the final destination of packaging and pesticide residues, its components and the like, in the State of Rio Grande do Norte, and provides other measures.	Economic aspects	2017	State	1
Nordeste	Rio Grande do Norte	Law 8,672 - Provides for the control of production, trade, use, storage, internal transportation, and the final destination of packaging and residues of pesticides, its components, and the like, in the State of Rio Grande do Norte, and provides other measures.	Pesticide use	2005	State	1
Nordeste	Rio Grande do Norte	Law No. 7.27	Pesticide use	2005	State
Nordeste	Sergipe	DECREE 21,400, DE 10/12/2002 (DO-SE, DE 26/12/2002) - C/ Republication in the DO-SE, of 02/25/2003 - - Provides for tax substitution in transactions subject to the Tax on Movement of Goods - ICM.	Awareness	1985	State	x
Nordeste	Sergipe	Law 8.497 - Provides for the Environmental Licensing Procedure in the State of Sergipe and provides other measures.	Pesticide use	2018	State	1
Nordeste	Sergipe	Law 2,441 - Provides for the control of agrotoxics and other biocides at the state level and provides other measures.	Apiculture practices	1983	State	1
Nordeste	Sergipe	Law 8,638 - Establishes the State Tax And Miscellaneous Services TFSD, amends the Laws 6,425, of June 20, 2008, at 6,661, of August 28, 2009, and 7,651, of May 31, 2013, and provides related arrangements.	Pesticide use	2019	State	1
Nordeste	Sergipe	Law 3,796 - State Standard - Sergipe - Published in the DOE on Dec 27, 1996 - Provides for the Tax on Operations Related to the Movement of Goods and on Services of Interstate and Intermunicipal Transportation and Communication Services (ICMS), and provides related measures.	Pesticide use	1996	State	x
Centro-oeste	Goiás	DECREE 5.587 - Approves and ratifies the ICMS Agreements 02/01 to 08/02 and amends Decree 4,852, of December 29, 1997, Regulation of the Tax Code of the State of Goiás.	Economic aspects	2002	State	x
Centro-oeste	Goiás	DECREE 6,717 - Approves and ratifies ICMS Agreements 110/07 to 150/07, Protocols ICMS 46/07, 72/07 to 75/07, 85/07, 86/07, 88/07 and 96/07 and Adjustments SINIEF 8/07 to 14/07 and amends Decree 4,852 of December 29, 1997, Regulation of the Tax Code of the State of Goiás.	Economic aspects	2008	State	x
Centro-oeste	Goiás	DECREE 4,019 - Approves the Regulation of sanitary and industrial inspection of products of animal origin in the State of Goiás.	Economic aspects	1993	State	x
Centro-oeste	Goiás	Law 18.745 - Amends Table Annex III of Law 11.651/91, which establishes the Tax Code of the State of Goiás.	Apiculture practices	2014	State	x
Centro-oeste	Goiás	DECREE 7,887 - Introduces amendments to the text of Law Regulation 13,443 of January 19, 1999, modified by Law 13,998 of December 13, 2001, which provides for the Animal Sanitary Defense of the State of Goiás, approved by Decree 5,652 of September 6, 2002.	Apiculture practices	2013	State	x
Centro-oeste	Goiás	Law 11.904 - Regulated by Decree 4.019/93 - Provides for sanitary and industrial inspection of animal products in the State of Goiás and provides other measures.	Apiculture practices	1993	State	x
Centro-oeste	Goiás	DECREE 9,267 - Amends Decree ,852 of December 29, 1997, Regulation of the Tax Code of the State of Goiás -RCTE-.	Apiculture practices	2018	State	x
Centro-oeste	Goiás	DECREE 9,130 - Provides for the State Payment Program for Environmental Services - PEPSA - and provides other measures.	Apiculture practices	2017	State	5, 10
Centro-oeste	Goiás	Law 12,666 - Provides for the budget guidelines for the financial year 1996 and provides other measures.	Economic aspects	1995	State	1
Centro-oeste	Goiás	DECREE 9,286 - Regulates Law 19,423 of July 26, 2016, which provides for the production, storage, trade, internal transportation, use, final destination of waste and packaging, inspection and inspection of pesticides, its components and the like, in the State of Goiás, and provides other measures.	Pesticide use	2018	State	1
Centro-oeste	Goiás	Law 19,423 - Regulates Law 19,423 of July 26, 2016, which provides for the production, storage, trade, internal transport, use, final destination of waste and packaging, inspection and inspection of pesticides, its components and the like, and provides other measures.	Pesticide use	2016	State	1
Centro-oeste	Goiás	Law 20,025 - Amends Law 19,423 of July 26, 2016, which provides for the production, storage, trade, internal transport, use, final destination of waste and packaging, inspection and inspection of pesticides, its components and the like, in the State of Goiás, and provides other measures.	Pesticide use	2018	State	1
Centro-oeste	Goiás	DECREE 4,580 - Regulates Law 12,280, of January 24, 1995, which provides for the control of pesticides, their competent and the like, at the state level and provides other measures.	Pesticide use	1995	State	1
Centro-oeste	Goiás	DECREE 4,600 - Approves the regulation of the Department of Agriculture and Supply and provides other measures.	Pesticide use	1995	State	x
Centro-oeste	Goiás	Law 19,574 - Provides for the termination of commission positions, changes to Laws and provides other measures with a view to implementing the new tax regime to be in force from January 1, 2017.	Pesticide use	2016	State	x
Centro-oeste	Goiás	Law 12.423 - Provides for the budget guidelines for the financial year 1995 and provides other measures.	Pesticide use	1994	State	1
Centro-oeste	Goiás	Law 9.614, DE 17 DECEMBER 1984. - See Law 12.280 - Provides for the control of pesticides and other biocides at the state level and provides other measures.	Pesticide use	1984	State	1
Centro-oeste	Goiás	Law 13.456 - See Law 16,272, of 30-05-2008, art. 17.	Pesticide use	1999	State	1
Centro-oeste	Goiás	Law 12.041 - Provides for the budget guidelines for the year 1994 and provides other measures.	Pesticide use	1993	State	1
Centro-oeste	Goiás	Law 11.757 - Provides for the budget guidelines for the year 1993 and provides measures.	Pesticide use	1992	State	1
Centro-oeste	Goiás	Law 13,506 Conversion of Provisional Measure 1,859-17, 1999 - Establishes a limitation period for the exercise of punitive action by the Federal Public Administration, direct and indirect, and provides other measures.	Pesticide use	1999	State	1
Centro-oeste	Goiás	Law 112 - ESTABLISHES THE CODE OF POSTURES OF THE MUNICIPALITY OF ANÁPOLIS AND PROVIDES OTHER MEASURES. The MAYOR OF THE MUNICIPALITY OF ANÁPOLIS, STATE OF GOIÁS, I make known that the City Council of Anápolis decreed and I sanction the following Law:	Pesticide use	1968	Municipal	x
Centro-oeste	Goiás	Law 7183 - "PROVIDES FOR THE SUPERVISION OF PESTICIDES AND RELATED, AND PROVIDES OTHER MEASURES".	City planning	1993	Municipal	1
Centro-oeste	Goiás	Law 19423 - Provides for the production, storage, trade, internal transportation, use, final destination of waste and packaging, inspection and supervision of pesticides, their components and the like, in the State of Goiás, and provides other measures.	Pesticide use	2016	State	1
Centro-oeste	Goiás	ORGANIC Law - ORGANIC LAW OF THE MUNICIPALITY OF ANÁPOLIS/GO.	Pesticide use	2009	Municipal	1, 7
Centro-oeste	Mato Grosso	Law 8.588 - Provides for the use, production, trade, storage, transportation, application and supervision of agrotoxics, their components and the like in the State of Mato Grosso.	Awareness	2006	State	1
Centro-oeste	Mato Grosso	Decree 1651 - Regulates Law 8,588 of November 27, 2006, which provides for the use, production, trade, storage, transportation, application, final destination of empty packaging and waste and the supervision of pesticides, its components and the like in the State of Mato Grosso, and provides other measures.	Pesticide use	2013	State	1
Centro-oeste	Mato Grosso	Law 13.0792 - Institutes the State Program to Encourage Beekeeping and provides other measures	Pesticide use	1992	State	6
Centro-oeste	Mato Grosso	Law 6,089 - provides for communicable diseases of animals and provides other measures	Awareness	1992	State	4
Centro-oeste	Mato Grosso	Law 10,486 – provides for animal health defense in the state of Mato Grosso and provides other measures	Apiculture practices	2016	State	4
Centro-oeste	Mato Grosso	Law 6034 - Establishes the state program to encourage beekeeping and provides other measures	Economic aspects	1992	State	6
Centro-oeste	Mato Grosso	Law 7,862 - Provides for state solid waste policy and provides other measures	Awareness	2002		1
Centro-oeste	Mato Grosso do Sul	Law 19,574 - Provides for the termination of commission positions, changes to Laws and provides other measures with a view to implementing the new tax regime to be in force from January 1, 2017.	Pesticide use	2016	municipal	x
Centro-oeste	Mato Grosso do Sul	DECREE 10,959 - Adds Article 8a to Annex II of the ICMS Regulation, which provides for the deferral of the launch and payment of ICMS, and provides other measures.	City planning	2002	State	x
Centro-oeste	Mato Grosso do Sul	DECREE 12.672 - Regulates the occupation, use of soil and water of the Damping Zone of the Pantanal State Park of Rio Negro.	Pesticide use	2008	State	x
Centro-oeste	Mato Grosso do Sul	Law 3.173 – Makes it mandatory to include bee honey in school meals and provides other measures.	City planning	2005	State	awareness
Centro-oeste	Mato Grosso do Sul	Law 3,631 – Provides for the State Policy for the Development and Expansion of Beekeeping and Meliponiculture, and provides other measures.	Awareness	2008	State	4, 6, 7, awareness
Centro-oeste	Mato Grosso do Sul	Law 3,823 - Establishes animal health protection and provides for related matters.	Awareness	2009	State	conservation and mantain
Centro-oeste	Mato Grosso do Sul	Law 4,820 – Provides for the rules governing the mandatory prior inspection and supervision of products of animal origin, produced by the State of Mato Grosso do Sul, intended for consumption, and on related materials.	Awareness	2016	State	x
Centro-oeste	Mato Grosso do Sul	Law 3,826 – Institutes fees related to or arising from the institutional action of the State Agency for Animal and Plant Sanitary Defense (IAGRO) and provides other measures.	Apiculture practices	2009	State	x
Centro-oeste	Mato Grosso do Sul	Law 2,951 – Provides for the use, production, marketing and storage of pesticides, their components and the like, State of Mato Grosso do Sul, and provides other measures.	Economic aspects	2004	State	1
Centro-oeste	Mato Grosso do Sul	Law 2,870 – Provides for the guidelines for the preparation of the Budget Law for the 2005 financial and economic year, and provides other measures.	Pesticide use	2004	State	x
Centro-oeste	Mato Grosso do Sul	Law 2,654 – Provides for the guidelines for the preparation of the Budget Law for the economic and financial year 2004, and provides other measures.	Economic aspects	2003	State	x
Centro-oeste	Mato Grosso do Sul	Law 2,493 – Provides for the guidelines for the preparation of the Budget Law for the economic and financial year of 2003, and provides other measures.	Economic aspects	2002	State	x
Centro-oeste	Mato Grosso do Sul	DECREE 9,356 – Provides for the administrative structure and composition of positions and functions of the Secretariat of the State environment, and provides other measures.	Economic aspects	1999	State	1
Centro-oeste	Mato Grosso do Sul	DECREE 9,333 – Provides for the administrative structure and composition of positions and functions of the Secretary of State for Sustainable Production and Development, and provides other arrangements.	City planning	1999	State	1
Centro-oeste	Mato Grosso do Sul	DECREE 8820 – Provides for the reorganization of the administrative structure and the composition of positions and functions of the Secretary of State for Environment and Sustainable Development and provides other measures.	City planning	1997	State	1
Centro-oeste	Mato Grosso do Sul	DECREE 2,440 - Regulates Law 398, of November 3, 1983, and provides other measures.	City planning	1984	State	1
Centro-oeste	Mato Grosso do Sul	DECREE 13,441 - Gives new wording to the arts. 6th and 22nd of Decree 12,673, of December 8, 2008, which creates the Damping Zone of the Várzeas State Park of the Ivinhema River.	Pesticide use	2012	State	1
Centro-oeste	Mato Grosso do Sul	DECREE 12,673 – Creates the Damping Zone and orders the use of soil and water sprained State Park of floodplains of the Ivinhema-MS River.	Pesticide use	2008	State	1
Centro-oeste	Mato Grosso do Sul	DECREE 12,059 – Regulates Law 2,951, of December 17, 2004, which provides for pesticides, their components and the like.	City planning	2006	State	1
Centro-oeste	Mato Grosso do Sul	DECREE 11.766 - Establishes criteria for calculating the costs of services provided by the Environment Institute of Mato Grosso do Sul, and provides other measures.	Pesticide use	2004	State	1
Centro-oeste	Mato Grosso do Sul	DECREE 10,471 - Amends Annex I to the ICMS Regulation, and provides other measures.	Economic aspects	2001	State	x
Centro-oeste	Mato Grosso do Sul	Law 1067 - ESTABLISHES THE CODE OF POSTURES OF THE MUNICIPALITY OF DOURADOS, STATE OF MATO GROSSO DO SUL	Economic aspects	1979	municipal	x
Centro-oeste	Distrito Federal	Law 5.344 -Provides for Environmental Rezoning and Plade Management of the Environmental Protection Area of the Saint Bartage River Basin. Prohibits the use of agrotoxics and other biocides without the agronomic prescription of integrated pest management;	City planning	2014	State	1
Centro-oeste	Distrito Federal	Law 5,886- Provides for guidelines for the promotion and inclusion of bee honey in the school lunch of the public network of the Federal District and provides other measures.	Pesticide use	2017	State	x
Centro-oeste	Distrito Federal	Law 5,930 - Provides for the obligation to receive empty packages of pesticides and pesticides by its producers and traders.	Awareness	2017	State	1
Centro-oeste	Distrito Federal	Law 5,897 - Institutes and includes, official calendar of events of the Federal District, the Day to Combat Pesticide Poisoning.	Pesticide use	2017	State	campain
Centro-oeste	Distrito Federal	Law 1,728 - Amends Article 27 of Law 414 of January 15, 1993, which provides for the production, storage, marketing, transportation, consumption, use, control, inspection, inspection and disposal of pesticides, its components and the related Federal District.	Pesticide use	1997	State	1
Centro-oeste	Distrito Federal	Law 1,298 - Provides for the preservation of native fauna and flora of the Federal District and socioeconomically important animal and plant species adapted to ecological conditions.	Awareness	1996	State	1
Centro-oeste	Distrito Federal	Law 1,261 - Provides for the use and preservation of the Rogério Pithon Farias Recreational Park	Awareness	1996	State	x
Sudeste	Espírito Santo	Law 1,649 - PROJECT OF POPULAR INITIATIVE ON THE USE OF AIRCRAFT IN THE DISPERSION OF PESTICIDES ON CROPS AND THE POPULATION.	Awareness	2017	municipal	1
Sudeste	Espírito Santo	Law 3121 - PROHIBITS THE LAUNCH OF PESTICIDES AND RELATED PRODUCTS, THROUGH AIRCRAFT, IN CROPS GROWN IN PROPERTIES LOCATED IN THE TERRITORIAL AREA OF THE MUNICIPALITY OF NOVA VENÉCIA-ES AND GIVES OTHERS.	Pesticide use	2011	municipal	1
Sudeste	Espírito Santo	Law 11077 - Provides for procedures to standardize the creation of native bees without stingwithin the State of Espírito Santo.	Meliponiculture practices	2019	State	4
Sudeste	Espírito Santo	DECREE 4442-R Regulates Law 5,760, of December 2, 1998, which provides for the use, production, consumption, trade, storage and transport of pesticides, its components and the like, Espírito Santo.	Pesticide use	2019	State	1
Sudeste	Espírito Santo	Law 9,976 - Amends Articles 5 and 6 and Article 16(II) of Law 5,760 of 1.12.1998, which regulates the use, production, consumption, trade, storage and transportation of pesticides, its components and the like of the State of Espírito Santo.	Pesticide use	2013	State	1
Sudeste	Espírito Santo	DECREE 1914-R - Amends the provision of the Regulation approved by Decree 024-R of March 23, 2000, amended by Decrees 1106-R of December 3, 2002 and 1304-R of April 6, 2004.	Pesticide use	2007	State	1
Sudeste	Espírito Santo	DECREE 1304-R - Amends provisions of the Regulation approved by Decree 024-R of March 23, 2000, as amended by Decree 1,106-R of December 3, 2002.	Pesticide use	2004	State	1
Sudeste	Espírito Santo	Law 6,610 - Provides for the Epidemiological Surveillance Program for Occupational Accidents and Occupational Diseases for the use of pesticides in the State of Espírito Santo and provides other measures.	Awareness	2001	State	1
Sudeste	Espírito Santo	Law 6 469 - Amends Art. 2, § 9, Art. 15 and Sole Paragraph and Art.18, § 1 of Law 5,760/98.	Pesticide use	2000	State	1
Sudeste	Espírito Santo	Law 5 760 - Disciplines the use, production, consumption, trade, storage and transport interdos pesticides, its components and the like State of Espírito Santo.	Pesticide use	1998	State	1
Sudeste	Espírito Santo	Law 3,864 Amends Law 3,706 of December 28, 1984.	Pesticide use	1986	State	1
Sudeste	Espírito Santo	Law 3,706 Controls the distribution, marketing and application, territory of the State of Espírito Santo, of any and all pesticide products and other biocides, conditioning them the previous registration before the Health Secretariat, with the prior opinion of the Secretary of State for Agriculture.	Meliponiculture practices	1984	State	1
Sudeste	Minas Gerais	Law 21.146 - ESTABLISHES THE STATE POLICY OF AGROECOLOGY AND ORGANIC PRODUCTION - PEAPO - AND GIVES OTHER MEASURES.	Awareness	2014	State	5, 7, 10
Sudeste	Minas Gerais	Decree 47692 – Amends Annex II of Decree 47,394 of March 26, 2018, which made public the list of normative acts relating to tax benefits related to ICMS, established in disagreement with the Federal Constitution, for the purpose of remission of tax credits and reinstatement of exemptions, incentives and tax or financial benefits, tt to Federal Supplementary Law 160 7 August 2017.	Economic aspects	2019	State	x
Sudeste	Minas Gerais	Decree 47670 - Amends the ICMS Regulation - RICMS - approved by Decree 43080 of December 13, 2002	Economic aspects	2019	State	x
Sudeste	Minas Gerais	Law 22549 - Establishes Regularization of Tax Credits, amends Laws 6,763 of December 26, 1975, 14,699, Of August 6, 2003, 14,937, of December 23, 2003, 14,941, of December 29, 2003, 15,273, of July 29, 2004, 19,971, of December 27, 2011, 21,016, of December 20, 2013 and 21,735 , of 3 August 2015, and provides other measures.	Economic aspects	2017	State	x
Sudeste	Minas Gerais	Law 15956 - Changes AS LawS 6,763, OF DECEMBER 26, 1975, WHICH CONSOLIDATES THE TAX LEGISLATION OF THE STATE OF MINAS GERAIS, 14,066, OF NOVEMBER 22, 2001, WHICH PROVIDES FOR THE PROTECTION OF FUEL CONSUMERS, 4,747, OF MAY 9, 1968, PROVIDES WHICH FOR THE COLLECTION OF STATE FEES, 11,403, OF JANUARY 21, 1994, REORGANIZES THE DEPARTMENT OF HIGHWAYS OF THE STATE OF MINAS, E 10.992, OF DECEMBER 29, 1…	Economic aspects	2005	State	x
Sudeste	Minas Gerais	Law 14009 - PROVIDES ABOUT THE INCENTIVE TO BEEKEEPING AND PROVIDES OTHER MEASURES.	Apiculture practices	2001	State	11, awareness
Sudeste	Minas Gerais	Law 12425 - AMENDS Law 6,763, OF DECEMBER 26, 1975, WHICHS THE TAX LAWS OF THE STATE OF MINAS GERAIS, AND PROVIDES OTHER MEASURES.	Economic aspects	1996	State	x
Sudeste	Minas Gerais	Law 11812 - PROVIDES ON THE SANITARY INSPECTION AND INSPECTION OF PRODUCTS OF ANIMAL ORIGIN AND PROVIDES OTHER MEASURES.	Apiculture practices	1995	State	x
Sudeste	Minas Gerais	Law 11508 - AMENDS THE DRAFTING OF PROVISIONS OF Law 6,763, OF DECEMBER 26, 1975, WHICH CONSOLIDATES THE TAX LEGISLATION OF THE STATE OF MINAS GERAIS, AND PROVIDES OTHER MEASURES.	Economic aspects	1994	State	x
Sudeste	Minas Gerais	Law 11363 - Changes laws 6,763, OF DECEMBER 26, 1975; 7,164 OF 19 DECEMBER 1977; And 10,992, DECEMBER 29, 1992, AND GIVES OTHER MEASURES.	Apiculture practices	1993	State	x
Sudeste	Minas Gerais	Law 14324 - CREATES THE STATE SYSTEM OF ENVIRONMENTAL QUALITY CERTIFICATION FOR INDUSTRIALIZED AND AGRICULTURAL GOODS AND PRODUCTS.	Pesticide use	2002	State	7
Sudeste	Minas Gerais	Law 22913 - Amends Law 10,545 of December 13, 1991, which provides for the production, marketing and use of pesticides and the like.	Pesticide use	2018	State	1
Sudeste	Minas Gerais	Law 10545 - PROVIDES FOR THE PRODUCTION, MARKETING AND USE OF PESTICIDES AND RELATED AND PROVIDES OTHER MEASURES.	Pesticide use	1991	State	1
Sudeste	Minas Gerais	Law 21971 - Estimates revenues and sets the expenses of the Fiscal Budget of the State of Minas Gerais and the Investment Budget of State-controlled Companies for the financial year 2016.	Economic aspects	2016	State	campain
Sudeste	Minas Gerais	Law 21968 - Establishes the PlaPluriannual government action for the four-year period 2016-2019 - PPAG - PPAG 2016-2019.	Economic aspects	2016	State	x
Sudeste	Minas Gerais	Law 18028 - ADDS ART. 9th-A To Law 10.545, OF DECEMBER 13, 1991, WHICH PROVIDES FOR THE PRODUCTION, MARKETING AND USE OF PESTICIDES AND RELATED PROVIDES OTHER MEASURES.	Pesticide use	2009	State	1
Sudeste	Minas Gerais	Law 15974 - PROVIDES FOR THE REVIEW OF THE PLAPLURIANUAL GOVERNMENT ACTION FOR THE PERIOD 2004 TO 2007 - PPAG (2004-2007) - FOR THE FINANCIAL YEAR 2006 AND PROVIDES OTHER MEASURES.	Awareness	2006	State	1
Sudeste	Minas Gerais	Law 15291 - PROVIDES FOR THE GUIDELINES FOR THE ELABORATION OF THE BUDGET LAW FOR THE FINANCIAL YEAR 2005 AND PROVIDES OTHER MEASURES.	Pesticide use	2004	State	1
Sudeste	Minas Gerais	Law 14125 - Alters PROVISIONS OF TABLE from Law 6,763, OF DECEMBER 26, 1975, WHICH CONSOLIDATES THE TAX LEGISLATION OF THE STATE, AND GIVES OTHER MEASURES.	Pesticide use	2001	State	x
Sudeste	Minas Gerais	Law 13430 - Changes DEVICES OF LAW S 6,763, OF DECEMBER 26, 1975; 12.425, DE 27 DECEMBER 1996, E 12.730, DE 30 DECEMBER 1997, AND GIVES OTHER MEASURES.	Economic aspects	1999	State	x
Sudeste	Minas Gerais	Law 23207 - Establishes the Agroecological and Organic Production Pole in the Zona da Mata region.	Awareness	2018	State	5, 7, 10
Sudeste	Minas Gerais	Law: 1764 - PROHIBITS THE LAUNCH OF PESTICIDES AND RELATED PRODUCTS, BY AIRCRAFT, IN CROPS CULTIVATED IN PROPERTIES LOCATED IN THE TERRITORIAL AREA OF THE MUNICIPALITY OF LIGHT AND PROVIDES OTHER MEASURES.	Awareness	2009	municipal	1
Sudeste	Minas Gerais	Law 12059 – MAKES MANDATORY THE INCLUSION OF BEE HONEY IN THE COMPLEMENTATION OF SCHOOL MEALS, IN MUNICIPAL PUBLIC SCHOOLS, AND PROVIDES OTHER MEASURES.	Awareness	2010	municipal	awareness
Sudeste	Minas Gerais	Law 12,582 – CHANGES AND ADDS DEVICES IN Law 10,700 OF MARCH 9, 2011 THAT PROVIDES FOR THE POLICY OF PROTECTION OF THE ENVIRONMENT AND GIVES OTHER MEASURES.	Awareness	2016	municipal	4
Sudeste	São Paulo	Law 16,684 - Establishes the State Policy of Agroecology and Organic Production - PEAPO, and provides other measures	Awareness	2018	State	7
Sudeste	São Paulo	Law 16,140 - Provides for the inclusion of organic or agroecological foods in school feeding within the Municipal System of Enside São Paulo, establishes criteria for this inclusion and provides other measures.	Awareness	2015	municipal	awareness
Sudeste	São Paulo	Law 10158 - VEDA THE USE MUNICIPALITY OF RIBEIRÃO PRETO, SPECIFICALLY IN THE URBAN AREA, OF PESTICIDES OF THE CLASS OF HERBICIDES IN PRACTICE CALLED "WEED CHEMICAL"	Awareness	2004	municipal	1
Sudeste	São Paulo	Law 15,266 - Provides for tax treatment related to the fees under the State Executive Branch.	Economic aspects	2013	State	x
Sudeste	São Paulo	Law 14,736 - Establishes the "State Day to Combat Pesticide Poisoning"	Awareness	2012	State	campain
Sudeste	São Paulo	Law 14,469 - Authorizes the Executive Branch to establish the Horta Program at school, and provides related measures.	Awareness	2011	State	aulas - awareness, campain
Sudeste	São Paulo	Law 12.518 - Authorizes the Executive Branch to establish the Incentive Program for the Organic System of Agricultural and Industrial Production within the State of São Paulo.	Awareness	2007	State	awareness
Sudeste	São Paulo	Law 11,971 - Provides for the Budget Guidelines for the financial year 2006.	Economic aspects	2005	State	1
Sudeste	São Paulo	Law 11,782 - Provides for the Budget Guidelines for the financial year 2005.	Economic aspects	2004	State	1
Sudeste	São Paulo	Law 10,773 - Declares Environmental Protection Area the Watershed River Battle.	Awareness	2001	State	8
Sudeste	São Paulo	Law 17,054 - Article 1 - The registration of companies, the registration of products and the supervision of the use, consumption, trade, storage, transportation, provision of service in the application and disposal of packaging of pesticides and related to phytosanitary use in agricultural area will be governed by this Law, observing, additionally, the applicable federal legislation.	Pesticide use	2019	State	1
Sudeste	Rio de Janeiro	Law 2155 - INSTITUTES THE INSECT BEE USEFUL AND PROTECTS THE MELÍFERA FLORA	Awareness	1993	State	11
Sudeste	Rio de Janeiro	Law 8.555, DE 07 OCTOBER 2019. Changes A Law 5.645/2010 AND INCLUDES OFFICIAL CALENDAR OF THE STATE OF RIO DE JANEIRO STATE WEEK OF THE BEEHIVE AND PROTECTION OF BEES TO BEES TO BE CELEBRATED ANNUALLY FROM THE 20TH OF THE MONTH OF MAY.	Awareness	2019	State	campain
Sudeste	Rio de Janeiro	Law 6441 – Changes A Law 3345, FROM DECEMBER 29, 1999, WHICH PROVIDES FOR AGRICULTURAL DEFENSE, CREATES THE STATE REGISTER OF PHYTOSANITARY PESTICIDES, PROHIBITS THE TRADE OF UNCERTIFIED SEEDLINGS AND SEEDS AND GIVES OTHER MEASURES.	Pesticide use	2013	State	1
Sudeste	Rio de Janeiro	Law 5548 - ESTABLISHES THE RIO-MEL PROGRAM WITHIN THE STATE OF RIO DE JANEIRO AND PROVIDES OTHER MEASURES.	Awareness	2009	State	aulas - awareness, campain
Sudeste	Rio de Janeiro	Law 8.625 – PROVIDES FOR THE STATE POLICY OF SUSTAINABLE RURAL DEVELOPMENT, AGROECOLOGY AND ORGANIC PRODUCTION STATE OF RIO DE JANEIRO.	Awareness	2019	State	5, 7, 10
Sudeste	Rio de Janeiro	Law 8.373 – THE EXECUTIVE POWER IS AUTHORIZED TO CREATE THE HORTA PROGRAM IN THE SCHOOL AND PROVIDES OTHER MEASURES.	Awareness	2019	State	awareness
Sudeste	Rio de Janeiro	Law 8280 – DECLARES OF RELEVANT ENVIRONMENTAL INTEREST THE CONSERVATION AND PROTECTION OF MOUNTAIN ECOSYSTEMS, TERRITORY OF THE STATE OF RIO DE JANEIRO, AND PROVIDES OTHER MEASURES.	Awareness	2019	State	5, 7, 10
Sudeste	Rio de Janeiro	Law 8.151 – ESTABLISHES THE REVERSE LOGISTICS SYSTEM OF PACKAGING AND PACKAGING WASTE WITHIN THE STATE OF RIO DE JANEIRO, IN ACCORDANCE WITH THE PROVISIONS OF FEDERAL LAW 12,305, DE 2010 AND DECREE 7404, 2010.	Pesticide use	2018	State	x
Sudeste	Rio de Janeiro	Law 7973 – Changes the Law 3325 OF December 17, 1999 THAT PROVIDES FOR ENVIRONMENTAL EDUCATION, ESTABLISHES THE STATE POLICY OF ENVIRONMENTAL EDUCATION, CREATES THE STATE PROGRAM OF ENVIRONMENTAL EDUCATION AND COMPLEMENTS Federal Law 9.795/99 SCOPE OF THE STATE OF RIO DE JANEIRO.	Awareness	2018	State	aulas - awareness, campain
Sudeste	Rio de Janeiro	Law 6849 - PROVIDES FOR THE CREATION OF PLADE POSITIONS, CAREERS AND REMUNERATION OF THE SECRETARY OF STATE FOR AGRICULTURE AND LIVESTOCK OF THE STATE OF RIO DE JANEIRO AND PROVIDES OTHER MEASURES.	City planning	2014	State	1
Sudeste	Rio de Janeiro	Law 6805 – INCLUDES ARTICLES IN LAW 4191, SEPTEMBER 30, 2003 - STATE POLICY OF SOLID WASTE, ESTABLISHING THE OBLIGATION TO IMPLEMENT REVERSE LOGISTICS SYSTEMS FOR ELECTRONIC WASTE, PESTICIDES, TIRES AND LUBRICATING OILS WITHIN THE STATE OF RIO DE JANEIRO.	Pesticide use	2014	State	1
Sudeste	Rio de Janeiro	Law 801 - PROVIDES ON THE CONTROL USE OF AGRICULTURAL PESTICIDE AT STATE LEVEL AND PROVIDES OTHER MEASURES.	Pesticide use	1984	State	1
Sudeste	Rio de Janeiro	Law 4106 - PROVIDES FOR COMPULSORY NOTIFICATION OF CASES OF POISONING BY PESTICIDES AND PROVIDES OTHER MEASURES	Awareness	2003	State	1
Sudeste	Rio de Janeiro	Law 3972 - PROVIDES ON USE, PRODUCTION, CONSUMPTION; TRADE, INTERNAL TRANSPORT, STORAGE, WASTE AND PACKAGING, AGROTOXIC AND ITS COMPONENTS AND RELATED AND, AS WELL AS, CONTROL, INSPECTION AND INSPECTION, AND PROVIDES OTHER MEASURES.	Pesticide use	2002	State	1
Sudeste	Rio de Janeiro	Law 3467 – PROVIDES FOR ADMINISTRATIVE SANCTIONS DERIVED FROM CONDUCT HARMFUL TO THE ENVIRONMENT STATE OF RIO DE JANEIRO, AND PROVIDES OTHER MEASURES.	Awareness	2000	State	1
Sudeste	Rio de Janeiro	Law 3325 – PROVIDES FOR ENVIRONMENTAL EDUCATION, ESTABLISHES THE STATE ENVIRONMENTAL EDUCATION POLICY, CREATES THE STATE PROGRAM OF ENVIRONMENTAL EDUCATION AND COMPLEMENTS Federal Law 9.795/99 SCOPE OF THE STATE OF RIO DE JANEIRO.	Awareness	1999	State	aulas - awareness, campain
Sudeste	Rio de Janeiro	Law 1027 – PROVIDES ABOUT THE POPULATION REGARDING THE PRESENCE OF PESTICIDE RESIDUES IN HORTIFRUTIGRANGEIROS PRODUCTS CONSUMED STATE.	Awareness	1986	State	1
Sudeste	Rio de Janeiro	Law 907 – ESTABLISHES THE OBLIGATION TO MENTION IN ALL OFFICIAL DOCUMENTS OF THE STATE, FROM THE PUBLICATION OF THIS Law, OF SAYINGS THAT ESTABLISHES, ALUSIVOS TO THE CAMPAIGN OF THE USE OF AGROTOXIC PRODUCTS.	Awareness	1985	State	campain
Sudeste	Rio de Janeiro	Law 6441 – Changes the Law 3345, FROM DECEMBER 29, 1999, WHICH PROVIDES FOR AGRICULTURAL DEFENSE, CREATES THE STATE REGISTER OF PHYTOSANITARY PESTICIDES, PROHIBITS THE TRADE OF UNCERTIFIED SEEDLINGS AND SEEDS AND GIVES OTHER MEASURES.	Pesticide use	2013	State	1
Sudeste	Rio de Janeiro	Law 5417 - REGULATIONS DETERMINATION CONTAINED ARTICLE 21 OF Law 3325, OF DECEMBER 17, 1999, SCOPE OF THE STATE OF RIO DE JANEIRO AND PROVIDES OTHER MEASURES.	Awareness	2009	State	aulas - awareness, campain
Sudeste	Rio de Janeiro	Law 4427 – ENCOURAGES ORGANIC AGRICULTURE, REGULATES ARTICLE 254, INCISO IV, OF THE CONSTITUTION OF THE STATE OF RIO DE JANEIRO, AND PROVIDES OTHER MEASURES.	Pesticide use	2004	State	5, 7, 10
Sudeste	Rio de Janeiro	Law 197 - Provides for the Code of Sanitary Surveillance, Zoonosis Surveillance and Agricultural Inspection of the Municipality of Rio de Janeiro and adds provisions to Title V of The First Book of Law 691, of December 24, 1984 - Municipal Tax Code.	Apiculture practices	2018	municipal	x
Sudeste	Rio de Janeiro	Law 691 - APPROVES THE TAX CODE OF THE MUNICIPALITY OF RIO DE JANEIRO AND GIVES OTHER MEASURES.	Apiculture practices	1984	municipal	x
Sul	Parana	Law 16,751 Establishes scope of the state system of ensifundamental and medium to school meals 100% organic	Awareness	2010	State	awareness
Sul	Parana	Law 6484 - REGULATES THE USE AND APPLICATION OF PESTICIDES NEAR THE SITES THAT SPECIFIES CASCAVEL MUNICIPALITY, AND PROVIDES OTHER MEASURES	Pesticide use	2015	municipal	1
Sul	Parana	Law 546 Regulates the use and application of agrotoxics in the periurban region, districts and rural villages.	Pesticide use	2018	municipal	1
Sul	Parana	Law 1.022 -Regulates the use and application of pesticides near the sites that specifies the municipality of Grandes Rios, and provides other measures. Authorship of executive branch. Sanctioned by Antônio Claudio Santiago. Grandes Rios - PR.	Pesticide use	2017	municipal	1
Sul	Parana	Law 1.417 - CHANGES THE CAPUT OF ARTICLE 4 OF Law 1106, OF MARCH 20, 1998, WHICH REGULATES THE APPLICATION OF PESTICIDES MUNICIPALITY OF CAMPO MOURÃO, WITH THE USE OF MANUAL COSTAL EQUIPMENT, MOTORIZED COSTAL, TRACTOR WITH BAR, ATOMIZERS AND CANNONS, AND GIVES OTHER MEASURES.	Pesticide use	2001	municipal	1
Sul	Parana	Law 1798 - Regulates the use and application of agrotoxics near the sites that specifies the municipality of Cambira, and provides other measures.	Pesticide use	2017	municipal	1
Sul	Parana	Law 710 - Regulates the use and application of agrotoxics in the periurban region, districts and rural villages.	Pesticide use	2018	municipal	1
Sul	Parana	Law 1.945 - Regulates the use and application of agrotoxics to sites that specifies the municipality of Araruna, and provides other measures.	Pesticide use	2017	municipal	1
Sul	Parana	Law 19152 - Provides for the creation, management, trade and transport of native social bees (meliponines)	Meliponiculture practices	2017	State	11
Sul	Parana	Law 18962 - inserts Official Calendar of Events of the State of Paraná the State Week of Awareness of the Use of Pesticides, with the objective of raising awareness among farmers and the general population about the risks of indiscriminate use of pesticides and domissanitary; and encourage correct practices of handling, application, storage and disposal of pesticides.	Awareness	2017	State	campaign
Sul	Parana	Law 17476 – Establishes a period for individuals and legal entities who have under their custody the BHC (Hexachlorobenzene) or any other pesticide prohibited by Law to submit, to the offices that it mentions, a declaration containing the data it specifies.	Pesticide use	2013	State	1
Sul	Parana	Law 15513 - Provides for the State Day of Awareness and Prevention of Pesticide Poisoning.	Awareness	2007	State	campaign
Sul	The Rio Grande do Sul	Law 3.128 - PROVIDES ON THE USE OF ORGANIC PRODUCTS IN THE SCHOOL MEALS OF MUNICIPAL SCHOOLS AND PROVIDES OTHER MEASURES.	Awareness	2017	municipal	awareness
Sul	The Rio Grande do Sul	Law 4886 - Provides for the inclusion of organic food in the school feeding within the municipality of Torres and all purchases destined to school feeding purchased by the municipality, establishes criteria for inclusion.	Awareness	2016	municipal	awareness
Sul	The Rio Grande do Sul	Law 17.504 - Changes the menu and art. 1, of Law 12.282, 2002, which provides on the supply of organic food in school meals in the educational units of the State of Santa Catarina.	Awareness	2018	State	awareness
Sul	The Rio Grande do Sul	Law 14763 - Provides for the creation, trade, and transport of stingless bees - State of Rio Grande do Sul.	Meliponiculture practices	2015	State	4
Sul	The Rio Grande do Sul	DECREE 54.514 - Establishes a working group to deal with issues related to the use of pesticides 2.4D State.	Pesticide use	2019	State	1
Sul	The Rio Grande do Sul	DECREE 53.888 - Changes Decree 32,854 of May 27, 1988, which regulates the registration procedure for pesticide and biocidal products established by Law 7,747 of December 22, 1982.	Pesticide use	2018	State	1
Sul	The Rio Grande do Sul	DECREE 52.029 - Creates the Integrated Pesticide Management System -SIGA.	Pesticide use	2014	State	1
Sul	The Rio Grande do Sul	Law 13.491 - Provides for the marketing, storage, and transit of apple, pear, and peach and their derivatives, for consumption territory of the State of Rio Grande do Sul and provides other measures	Pesticide use	2010	State	1
Sul	The Rio Grande do Sul	DECREE 42.028 - Establishes the State Technical Commission for Analysis of the Register of Pesticides and the Like.	Awareness	2002	State	1
Sul	The Rio Grande do Sul	DECREE 35.428 – Changes and includes provisions DECREE 32,854, of May 27, 1988.	Pesticide use	1994	State	1
Sul	The Rio Grande do Sul	Law 8.986 – Establishes, throughout the state territory, compulsory notification for cases of human intoxication by-products and chemical substances and/or biological agents that have received hospital or outpatient care and provides other measures.	Pesticide use	1990	State	1
Sul	The Rio Grande do Sul	Law 8.784 – Authorizes the Executive Branch to establish disciplines of ecology and pesticides in rural and agricultural schools of the State.	Awareness	1998	State	awareness
Sul	The Rio Grande do Sul	DECREE 32.854 – Regulates the registration procedure for pesticides and biocides established by Law 7,747 of December 22, 1982, and provides other measures.	Pesticide use	1988	State	1
Sul	The Rio Grande do Sul	Law 7.747 - Provides for the control of pesticides and other biocides at the state level and provides other measures	Pesticide use	1982	State	1
Sul	The Rio Grande do Sul	DECREE 30.781 – Deals with the implementation of the program of technical assistance and rural extension in charge of the organs of the direct and indirect administration of the State, provides for the use of agricultural pesticides, and provides other measures.	Pesticide use	1982	State	1
Sul	Santa Catarina	DECREE 1,866 - Introduces Changes 4,005 RICMS/SC-01 and establishes other measures	Pesticide use	2018	State	x
Sul	Santa Catarina	Law 7.723 - Disposes of the bee and the honey flora.	Awareness	1989	State	11
Sul	Santa Catarina	Law 10.297 - Provides for the Tax on Operations Related to the Movement of Goods and on Services of Interstate and Intermunicipal Transportation and Communication Services - ICMS and adopts other measures.	Apiculture practices	1996	State	x
Sul	Santa Catarina	Law 10.366 - Provides for the implementation of animal health defense policy and adopts other measures.	Apiculture practices	1997	State	x
Sul	Santa Catarina	Law 16.171 - Provides for the creation, trade, and transport of stingless bees State of Santa Catarina.	Meliponiculture practices	2013	State	4
Sul	Santa Catarina	Law 17.099 - Changes a Law 16.171, 2013, which "Provides for the creation, trade, and transport of stingless bees State of Santa Catarina".	Meliponiculture practices	2017	State	x
Sul	Santa Catarina	Law 4867 - PROVIDES ON THE PROHIBITION OF THE PRACTICE OF CHEMICAL WEED MUNICIPALITY OF JARAGUÁ DO SUL	Pesticide use	2008	municipal	1
