# Supplementary material
Source: Elsevier journal article supplement (https://www.sciencedirect.com/science/article/pii/S2530064421000031)
Supplement: mmc3 [file S2530064421000031:mmc3.xlsx]

## Sheet: Planilha1
Sup 3. Federal laws related to pollinator-relevant legislation in Brazil
Laws / Policy of Title/ description	Search term
DECREE No. 8,133, FROM OCTOBER 28, 2013 Provides for the declaration of a state of plant or zoosanitary emergency that deals with Law No. 12,873, of October 24, 2013, and provides other measures.	pesticide
LAW 11.705/2008 - AMENDS LAW No. 9,503, OF SEPTEMBER 23, 1997, WHICH 'ESTABLISHES THE BRAZILIAN TRAFFIC Code', AND LAW No. 9,294, OF JULY 15, 1996, WHICH DISCONTENTS THE RESTRICTIONS ON THE USE AND ADVERTISING OF PHARMACEUTICAL PRODUCTS, ALCOHOLIC BEVERAGES.	pesticide
DECREE No. 5,981 OF DECEMBER 6, 2006. Gives new wording and includes provisions to Decree No. 4,074 of January 4, 2002, which regulates Law No. 7,802 of July 11, 1989, which provides for research, experimentation, production, packaging and labeling, transportation, storage, marketing, commercial advertising, use, use of, the import, export, final destination of waste and packaging, registration, …	pesticide
DECREE No. 5,549, OF SEPTEMBER 22, 2005. Gives new wording and repeals provisions of Decree No. 4,074 of January 4, 2002, which regulates Law No. 7,802 of July 11, 1989, which provides for research, experimentation, production, packaging and labeling, transportation, storage, marketing, commercial advertising, use, the import, export, final destination of waste and packaging, registration, classi…	pesticide
DECREE No. 5,360 OF JANUARY 31, 2005. Promulgates the Convention on Informed Prior Consent Procedure for International Trade in Certain Hazardous Chemicals and Pesticides, adopted on September 10, 1998, in the city of Rotterdam.	pesticide
LAW No. 7,802, DE 11 JULY 1989. Regulation Provides for research, experimentation, production, packaging and labeling, transportation, storage, marketing, commercial advertising, use, import, export, the final destination of waste and packaging, registration, classification, control, inspection and supervision of pesticides, their components and the like, and makes other arrangements.	pesticide
LAW No. 10,702, DE 14 JULY 2003. Conversion of MPv No. 118, 2003 Amends Law No. 9,294 of July 15, 1996, which provides for restrictions on the use and advertising of tobacco products, alcoholic beverages, medicines, therapies, and agricultural pesticides, according to § 4 of art. 220 of the Federal Constitution.	pesticide
LAW No. 10,603, DECEMBER 17, 2002.MPv No. 69 veto message of 2002 Provides for the protection of undisclosed information submitted for approval of the marketing of products and provides other measures.	pesticide
DECREE No. 4,074, OF JANUARY 4, 2002Text compiled Regulates Law No. 7,802 of July 11, 1989, which provides for research, experimentation, production, packaging and labeling, transportation, storage, marketing, commercial advertising, use, import, export, the final destination of waste and packaging, registration, classification, control, the inspection and inspection of pesticides, their componen…	pesticide
LAW No 9,974, OF 6 JUNE 2000. Message Amends Law No. 7,802 of July 11, 1989, which provides for research, experimentation, production, packaging and labeling, transportation, storage, marketing, commercial advertising, use, import, export, the final destination of waste and packaging, registration, classification, the control, inspection and inspection of pesticides, their components and the like…	pesticide
DECREE No. 2,018, OCTOBER 1, 1996. It regulates Law No. 9,294 of July 15, 1996, which provides for restrictions on the use and advertising of tobacco products, alcoholic beverages, medicines, therapies, and agricultural pesticides, according to § 4 of Article 220 of the Constitution.DECRETO No. 2,018, OCTOBER 1, 1996. It regulates Law No. 9,294 of July 15, 1996, which provides for restrictions on…	pesticide
LAW No. 9,294, DE 15 JULY 1996. Regulation Provides for restrictions on the use and advertising of smoking products, alcoholic beverages, medicines, therapies, and agricultural pesticides, according to § 4 of Article 220 of the Federal Constitution.	pesticide
DECREE No. 8,703, APRIL 1, 2016Promulgates the Preferential Trade Agreement between the Southern Common Market - Mercosur and the Southern African Customs Union - Sacu, signed by Mercosur member countries in Salvador on December 15, 2008, and by African countries in Maseru on April 3, 2009.	Bee
DECREE No. 8,205, OF MARCH 12, 2014Provides the attributions of the Positions of Technical Activities of Technical Inspection of Federal Agricultural Laboratory Technician, Agent of Agricultural Activities, Agent of Sanitary and Industrial Inspection of Animal Products, Laboratory Assistant and Operational Assistant in Agriculture, of the Staff of the Ministry of Agriculture, Livestock and Supply.	Bee
DECREE No. 7,708, APRIL 2, 2012Instituithe Brazilian Nomenclature of Services, Intangibles, and Other Operations that Produce Variations in Equity - NBS and the Explanatory Notes of the Brazilian Nomenclature of Services, Intangibles, and Other Operations that Produce Variations in Equity - NEBS.	Bee
DECREE No. 6,871, OF JUNE 4, 2009. It regulates Law No. 8,918 of July 14, 1994, which provides for the standardization, classification, registration, inspection, production, and inspection of beverages.	Bee
DECREE OF 28 MAY 1996. It creates the Area of Relevant Ecological Interest Serra da Abelha, in the municipality of Vitor Meireles, State of Santa Catarina, and provides other measures. It declares of social interest, for agrarian reform, the rural properties it mentions, and provides other measures.	Bee
LAW No. 3,520, DECEMBER 30, 1958. Promulgation of the vetoed partiesAmends the legislation of the Consumer Tax and provides other measures.	Bee
LAW No. 14,006, FROM MAY 28, 2020Veto Message Amends Law No. 13,979 of February 6, 2020, to establish the deadline of 72 (seventy-two) hours for the National Health Surveillance Agency (ANVISA) to authorize the import and distribution of any materials, medicines, equipment and health care products registered by the foreign health authority and authorized for commercial distribution in their respe…	agricultural pesticides
DECREE No. 10,375, OF MAY 26, 2020 - Establishes the National Bio inputs Program.	agricultural pesticides
